# Supplementary material for: TGFB1 Induces Fetal Reprogramming and Enhances Intestinal Regeneration
Source: PubMed Central journal article supplement — bioRxiv. 2023 Jan 13:2023.01.13.523825. Preprint. [Version 1] doi: 10.1101/2023.01.13.523825 (PMC9882197; doi:10.1101/2023.01.13.523825), 2023-01-13
Supplement: NIHPP2023.01.13.523825v1-supplement-1.pdf [file NIHPP2023.01.13.523825v1-supplement-1.pdf]

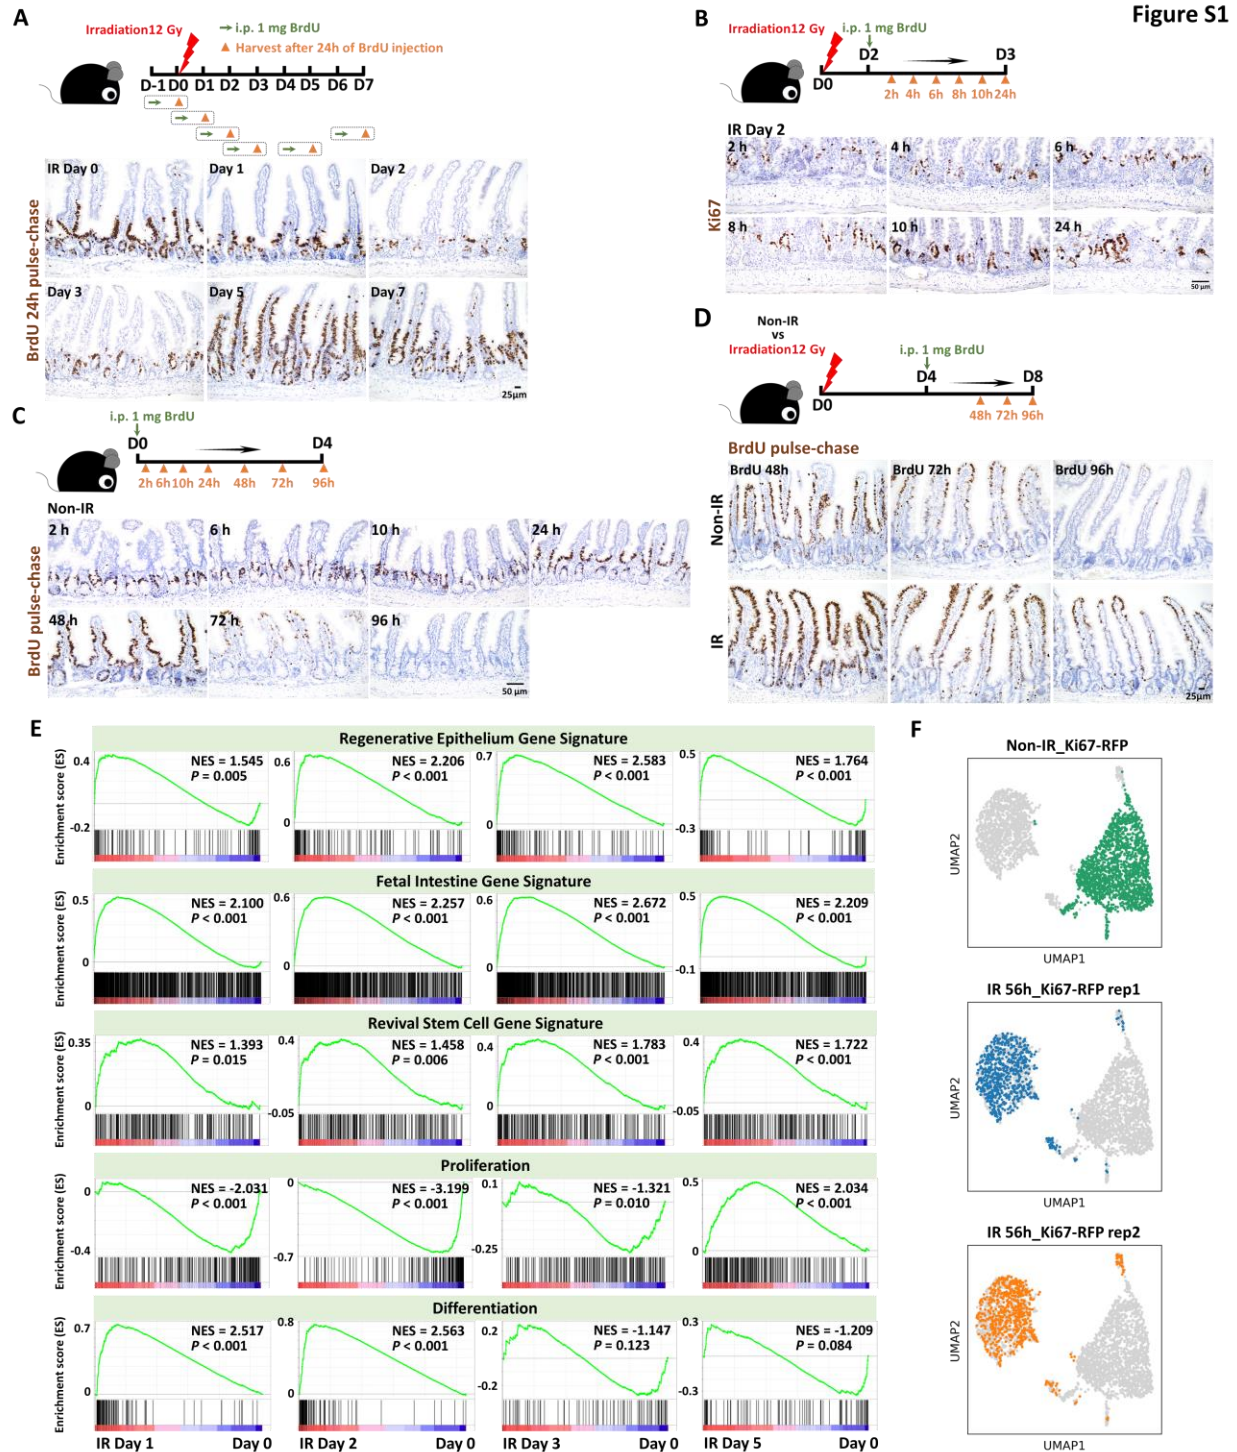

**Figure S1. Day 2 to Day 3 post-irradiation is a critical regeneration period of crypt cells. (A)** BrdU pulse-chase immunostaining of the intestine upon irradiation (representative of 3 biological replicates). Mice were injected with 1 mg of BrdU before or after irradiation. Intestines were collected after 24 hours of BrdU injection (see time-course details in the schematic of experimental design). **(B)** Immunostaining of Ki67 in the intestinal tissues of mice after 12 Gy irradiation. Ki67: proliferative marker, brown color; representative of 3 biological replicates. The schematic of experimental design was the same as BrdU

experiment performed in **Figure 1B**. **(C)** BrdU pulse-chase immunostaining of the intestinal tissues collected from the non-IR control mice (representative of 3 biological replicates). For BrdU immunohistochemistry, mice were injected with 1 mg of BrdU. Intestinal tissues were harvested after 2, 6, 10, 24, 48, 72 and 96 hours of BrdU injection. **(D)** BrdU pulse-chase immunostaining of the intestinal tissues (representative of 3 biological replicates). Mice were injected with 1 mg of BrdU at Day 4 post-irradiation. Tissues were collected after 48, 72 and 96 hours of BrdU injection (see time-course details in the schematic of experimental design). BrdU positive cells are marked brown. Non-IR mice were used as controls. **(E)** GSEA examines expression changes in gene signatures of regenerative epithelium, fetal spheroid, revival stem cell, proliferation, and differentiation (Ayyaz et al., 2019; Merlos-Suarez et al., 2011; Mustata et al., 2013; Wang et al., 2019; Yui et al., 2018) at time points post-irradiation. Bulk RNA-seq was used in this analysis (GSE165157 (Qu et al., 2021), crypt cells, n=2 biological replicates per time-course, Kolmogorov-Smirnov test). **(F)** scRNA-seq reveals that sorted Ki67-RFP positive cells show different transcriptome profiles after 56 hours of irradiation compared to the non-IR controls. Number of cells in each condition was Non-IR Ki67-RFP positive cells: n=1739; IR 56h Ki67-RFP positive cells replicate 1: n=677; IR 56h Ki67-RFP positive cells replicate 2: n= 669. Ki67-RFP positive cells were isolated and sorted from crypt cells of *Mki67tm1.1Cle/J* mice after 56 hours of IR vs. non-IR control.

Figure S2

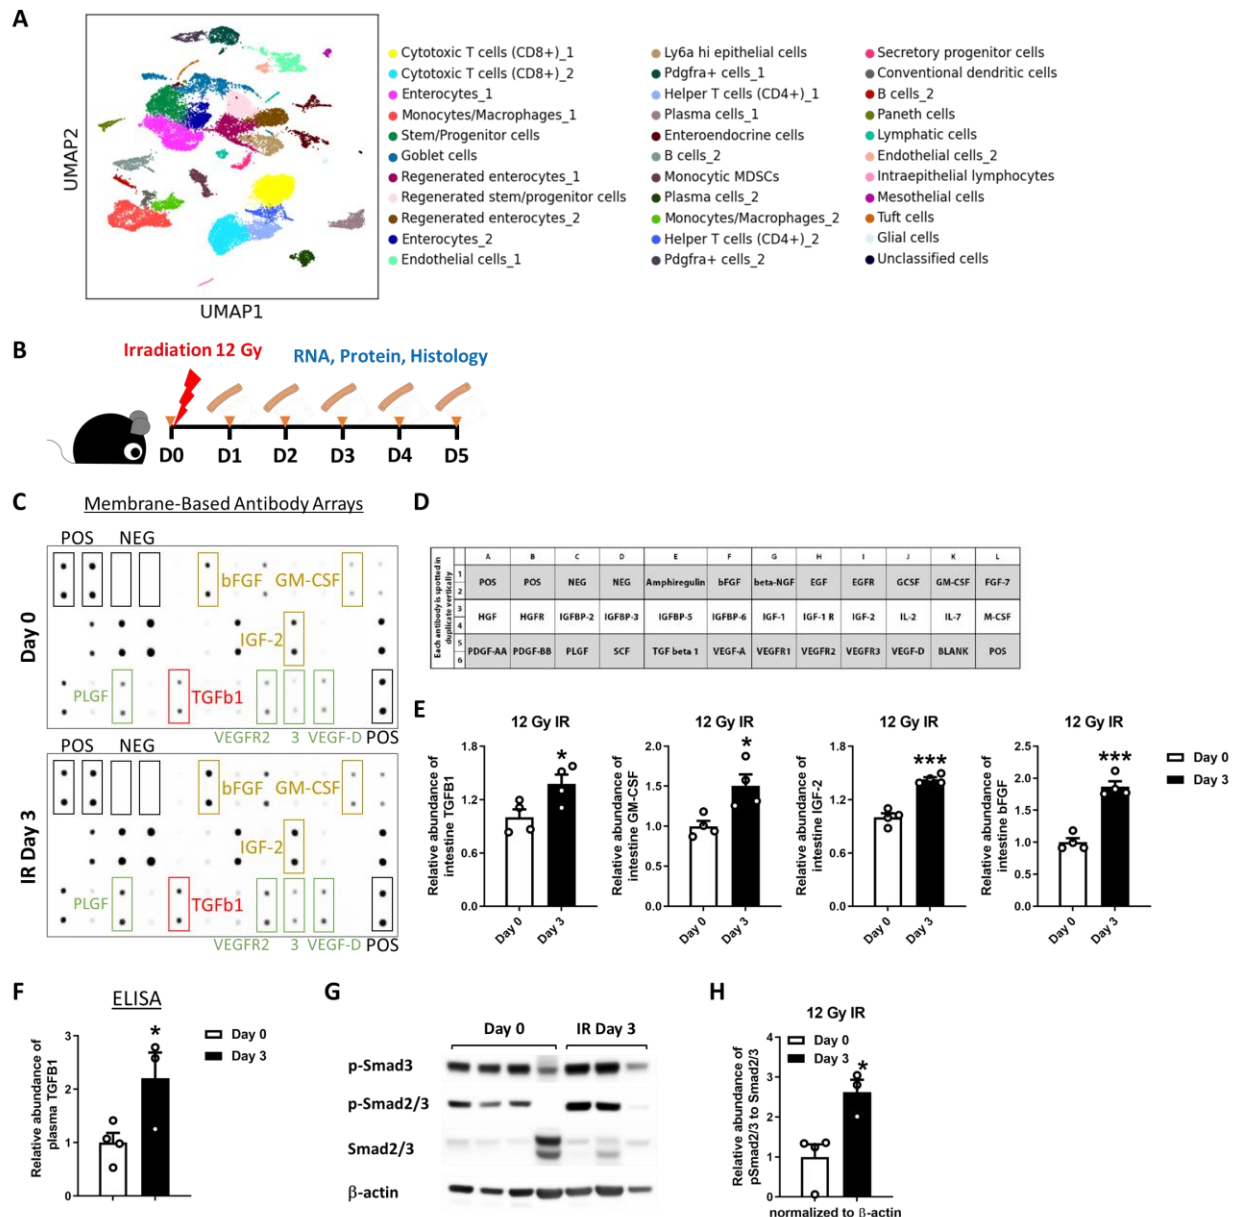

**Figure S2. TGFb signaling is activated in Day 3 irradiated mouse intestine. (A)** Identified cell populations of intestinal scRNA-seq data following mouse irradiation at days 0, 1, 3, 7, and 14, as shown in **Figure 2B** (GSE165318, n=3-4 biological replicates per time-course). **(B)** Schematics of IR time-course and sample collection for RNA, protein and histology. **(C-E)** IGF-2 is reported to preprogram maturing macrophages (TGFb1 producers) to acquire oxidative phosphorylation-dependent anti-inflammatory properties (Du et al., 2019). On the other hand, TGFb1 is known to enhance CM-CSF (Celada and Maki, 1992) and bFGF (Pertovaara et al., 1993), and we found TGFb1 and its related growth factors are all enriched in Day 3 intestine post-irradiation. Increased PLGF and VEGF were reported under pathologic situations, which are also observed in our study. **(E)** Quantification (n=2 independent experiments, 2 technical replicates per membrane, Student's t-test at  $P < 0.001$ \*\*\* and  $P < 0.05$ \*). **(F)** Increased TGFb1 is observed in plasma at Day 3 post-irradiation compared to Day 0, as determined by ELISA (n=3-4

biological replicates, Student's t-test at  $P < 0.05^*$ ). **(G-H)** Western blot reveals that increased p-Smad3 and p-Smad2/3 levels (TGFB pathway) are detected in the intestine after 3 days of irradiation. **(H)** Quantification of western blot (n=3-4 biological replicates, Student's t-test at  $P < 0.05^*$ ). TGFB1: Transforming growth factor beta 1; bFGF: Basic fibroblast growth factor; GM-CSF: Granulocyte-macrophage colony-stimulating factor; IGF-2: insulin-like growth factor; PLGF: Placental growth factor; VEGF: Vascular endothelial growth factor.



Figure S3

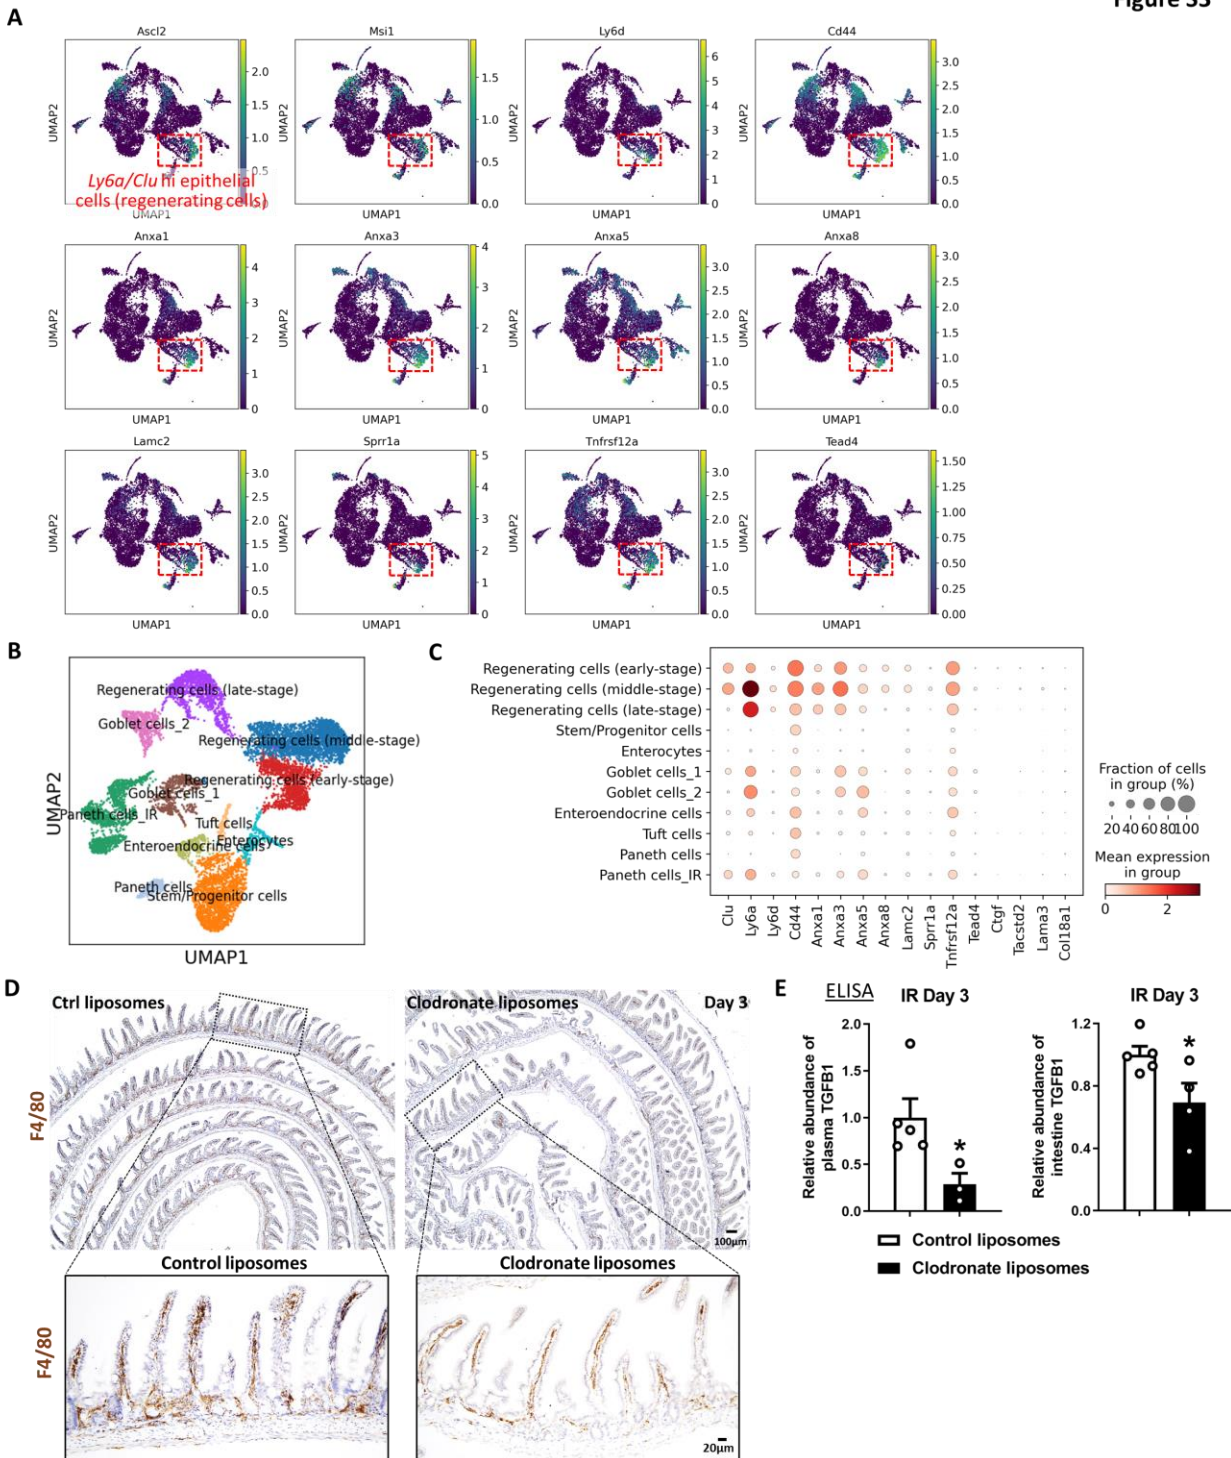

scRNA-seq. Identified cell populations **(B)** of intestinal scRNA-seq data following mouse irradiation at days 0, 1, 2, 3, and 5 (GSE145866 (Sheng et al., 2020)). Fetal/regenerative transcripts **(C)** are highly enriched in these regenerating cells. **(D-E)** Monocytes/Macrophages were depleted using clodronate-containing liposomes (see schematic of experimental design in **Figure 3F**). Immunostaining **(D)** was performed to confirm reduction in F4/80 (monocyte/macrophage marker) expressing cells upon treatment. Reduced levels of TGF $\beta$ 1 are observed in the plasma and intestine upon treatment of clodronate liposomes compared to treatment with control liposomes, as evidenced by ELISA **(E)**. Plasma and duodenal fragments were collected 3 days post-irradiation (n=3-5 biological replicates, Student's t-test at  $P < 0.05^*$ ).

Figure S4

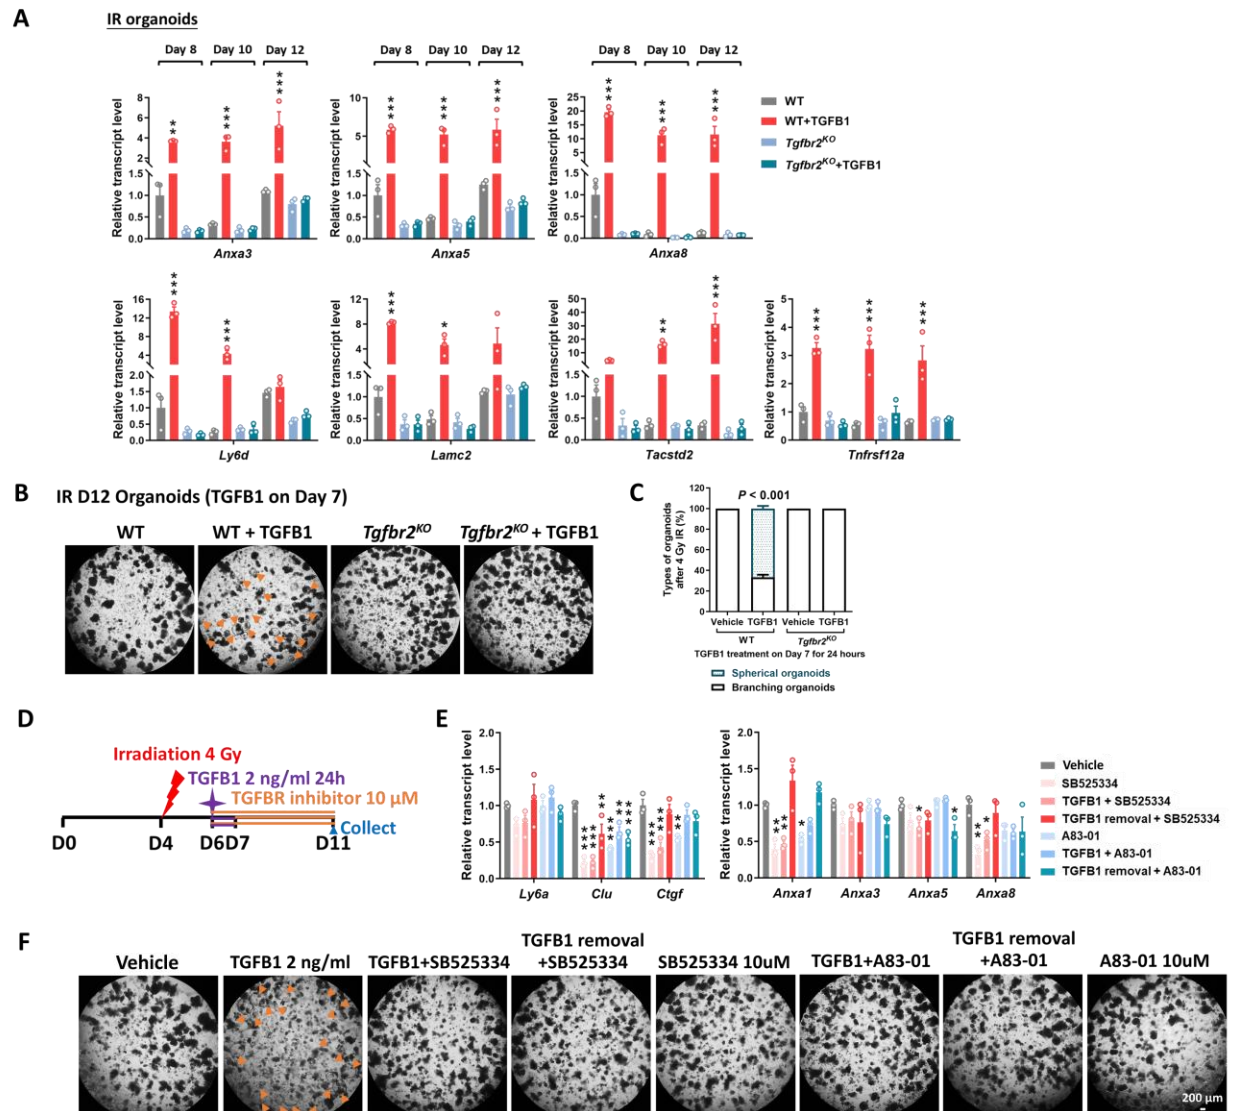

**Figure S4. Inactivation of *Tgfb2* abolishes TGFB1-induced spheroid morphology and fetal/regenerative gene signatures. (A)** qRT-PCR indicates that expression of regeneration marker genes increases within 24 hours and remains elevated for at least 5 days post-TGFB1 treatment in organoids post-irradiation. This induction is dependent on *Tgfb2*. Schematic of experimental design of qRT-PCR for panel A is depicted in **Figure 4F**. Transcript levels are relative to WT, and statistical comparisons were performed using one-way ANOVA followed by Dunnett's post at  $P < 0.001^{***}$ ,  $P < 0.01^{**}$  or  $P < 0.05^*$  ( $n=3$  independent organoid cultures). **(B-C)** Loss of *Tgfb2* abolishes TGFB1 induced spheroid morphology (orange arrows,  $n=3$  independent organoid cultures). **(B)** Representative images. **(C)** Quantification. Statistical comparisons were performed using one-way ANOVA followed by Dunnett's post at  $P < 0.001$ . Schematic of experimental design for panels B-C is in **Figure 4F**. These findings were corroborated by adding TGFB receptor inhibitors **(D-F)**. **(D)** Schematic of intervention experiment using TGFB receptor inhibitors. Primary intestinal organoids were exposed to 4 Gy of irradiation on Day 4, followed by TGFB1 treatment (2 ng/ml) on Day 6 for 24 hours. TGFB receptor inhibitor, 10  $\mu$ M SB525334 or A83-01, was added at the same time with TGFB1 treatment, or added after removal of TGFB1, or

added without TGFB1 pre-treatment. The corresponding intervention continued until Day 11. Organoids were imaged on Day 11, and then collected for qRT-PCR. **(E)** Presence of TGFB receptor inhibitors suppresses TGFB1-induced expression of fetal/regenerative genes. Transcript levels relative to vehicle, and statistical comparisons were performed using one-way ANOVA followed by Dunnett's post at  $P < 0.001^{***}$ ,  $P < 0.01^{**}$  or  $P < 0.05^*$  (n=3 independent organoid cultures). All the qRT-PCR data are presented as mean  $\pm$  SEM. **(F)** TGFB receptor inhibitors abolish TGFB1-induced spheroid morphology (orange arrows, n=3 independent organoid cultures).



Figure S5

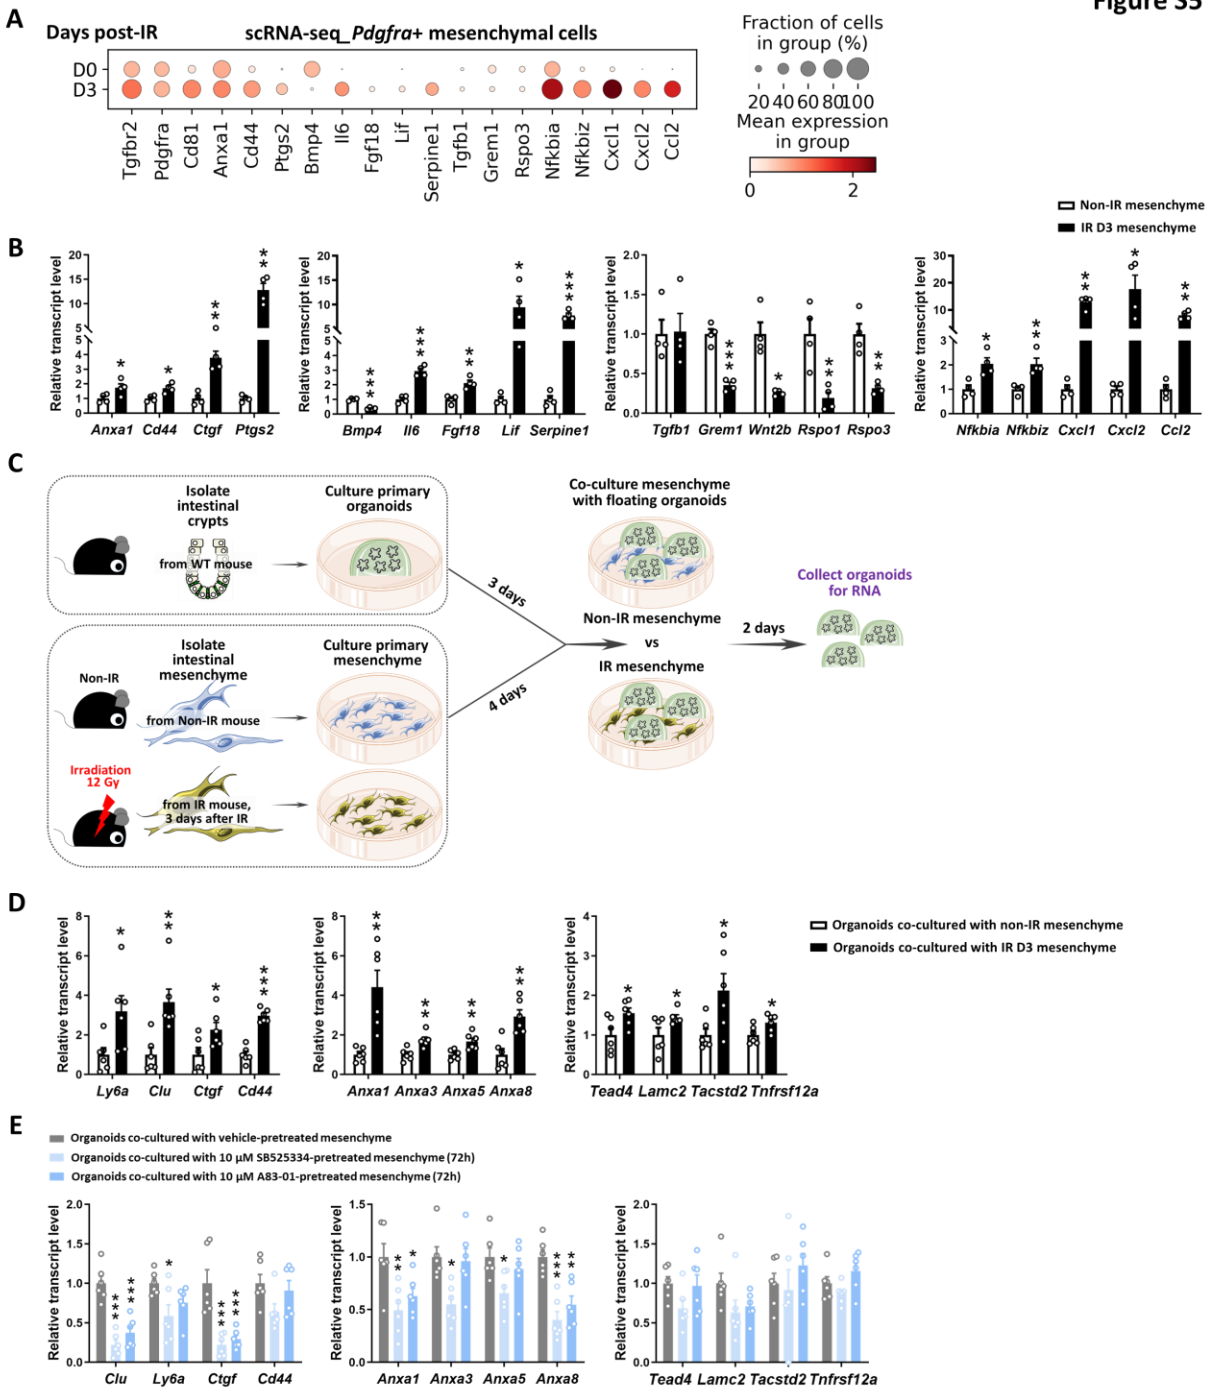

**Figure S5. Mesenchyme isolated from mice post-irradiation promotes fetal-like gene signatures of intestinal organoids.** (A-B) Cultured mesenchymal cells isolated from mice with or without irradiation harbor similar features of cells isolated from primary *Pdgfra* positive mesenchymal cells, as evidenced by scRNA-seq dot plots (A) of *Pdgfra* positive mesenchyme cell cluster (primary cells, GSE165318) and qRT-PCR (B) of cultured mesenchyme (n=4 independent mesenchyme cultures with 2 different primary cell lines). (C) Schematic of co-culture experimental design. Intestinal mesenchymal cells were isolated from mice with or without irradiation (12 Gy, 3 days post-IR) and cultured for 4 days. They were then overlaid

with Day 3 primary organoids in matrigel bubbles for another 2 days. Co-cultured organoids were collected as floating matrix bubbles for qRT-PCR. **(D)** qRT-PCR reveals that compared to the non-IR condition, mesenchyme isolated from mice post-irradiation shows stronger induction of fetal/regenerative gene expression in co-cultured organoids (n=6 independent organoid cultures with 2 different cell lines of mesenchyme and 3 different cell densities). The qRT-PCR data are presented as mean  $\pm$  SEM (Student's t-test at  $P < 0.001^{***}$ ,  $P < 0.01^{**}$  or  $P < 0.05^*$  for panels B and D). **(E)** Mesenchyme pre-treated with TGFBR inhibitors suppresses fetal-like gene signatures of co-cultured intestinal organoids. Passaged intestinal mesenchyme cells were pre-treated with vehicle or TGFBR inhibitors for 3 days, and then co-cultured with Day 3 primary organoids for 2 days (similar procedure as shown in [Figure 5D](#)). Co-cultured organoids were collected for qRT-PCR (n=6 independent organoid cultures with 2 different cell densities of mesenchyme). TGFBR inhibitors were removed during co-culture. Transcript levels relative to vehicle control, and statistical comparisons were performed using one-way ANOVA followed by Dunnett's post at  $P < 0.001^{***}$ ,  $P < 0.01^{**}$  or  $P < 0.05^*$ .

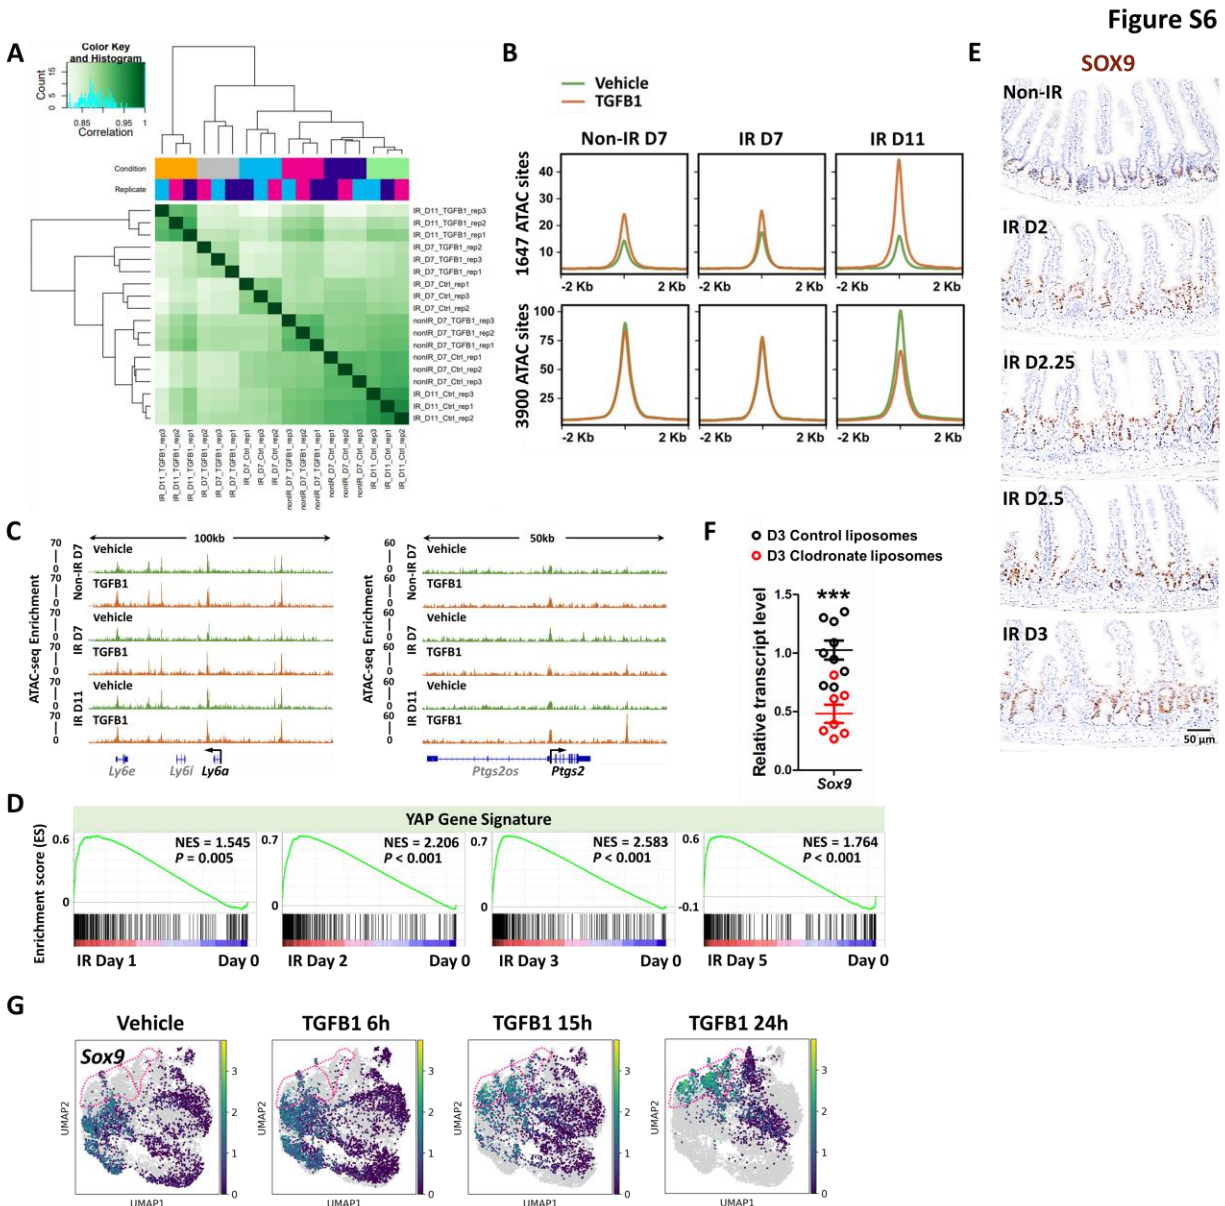

**Figure S6. TGFβ1 activates intestinal YAP and SOX9 regenerative programs. (A)** ATAC-seq correlation heatmap of organoids upon TGFβ1 treatment (DiffBind package, n=3 independent organoid cultures, at MACS2 called peaks of  $q < 0.05$ ). The experimental design is the same as bulk RNA-seq and shown in [Figure 4A](#). **(B)** Average signal of ATAC-seq in accessible chromatin regions of vehicle or TGFβ1 treated organoids (Differential ATAC-seq regions defined in [Figure 6A](#), Diffbind FDR < 0.01). **(C)** Examples of genes located at ATAC-seq enriched regions of TGFβ1-treated organoids using IGV. **(D)** GSEA reveals gene signatures of elevated YAP signaling (Gregorieff et al., 2015) post-irradiation, using a bulk RNA-seq of an IR time-course data set (GSE165157 (Qu et al., 2021), crypt cells, n=2 biological replicates per time-course, Kolmogorov-Smirnov test). **(E)** Intestinal immunostaining of SOX9 from day 2 to day 3 post-IR vs. non-IR (brown color; representative of 3 biological replicates). **(F)** Depletion of monocytes/macrophages (main cell sources of TGFβ1 secretion) results in a downregulation of Sox9, as evidenced by qRT-PCR (n=7-9 biological replicates, duodenal fragments, Student's t-test at  $P < 0.001$ \*\*\*). **(G)** scRNA-seq UMAP

plots indicate that TGFB1 induces *C/u*-expressing cells that highly express *Sox9* (shown within pink dotted line, defined in [Figure 4K](#)). Number of cells in each condition was Vehicle: n= 2815; TGFB1 6h: n= 4071; TGFB1 15h: n= 2788; TGFB1 24h: n=2177.

Figure S7

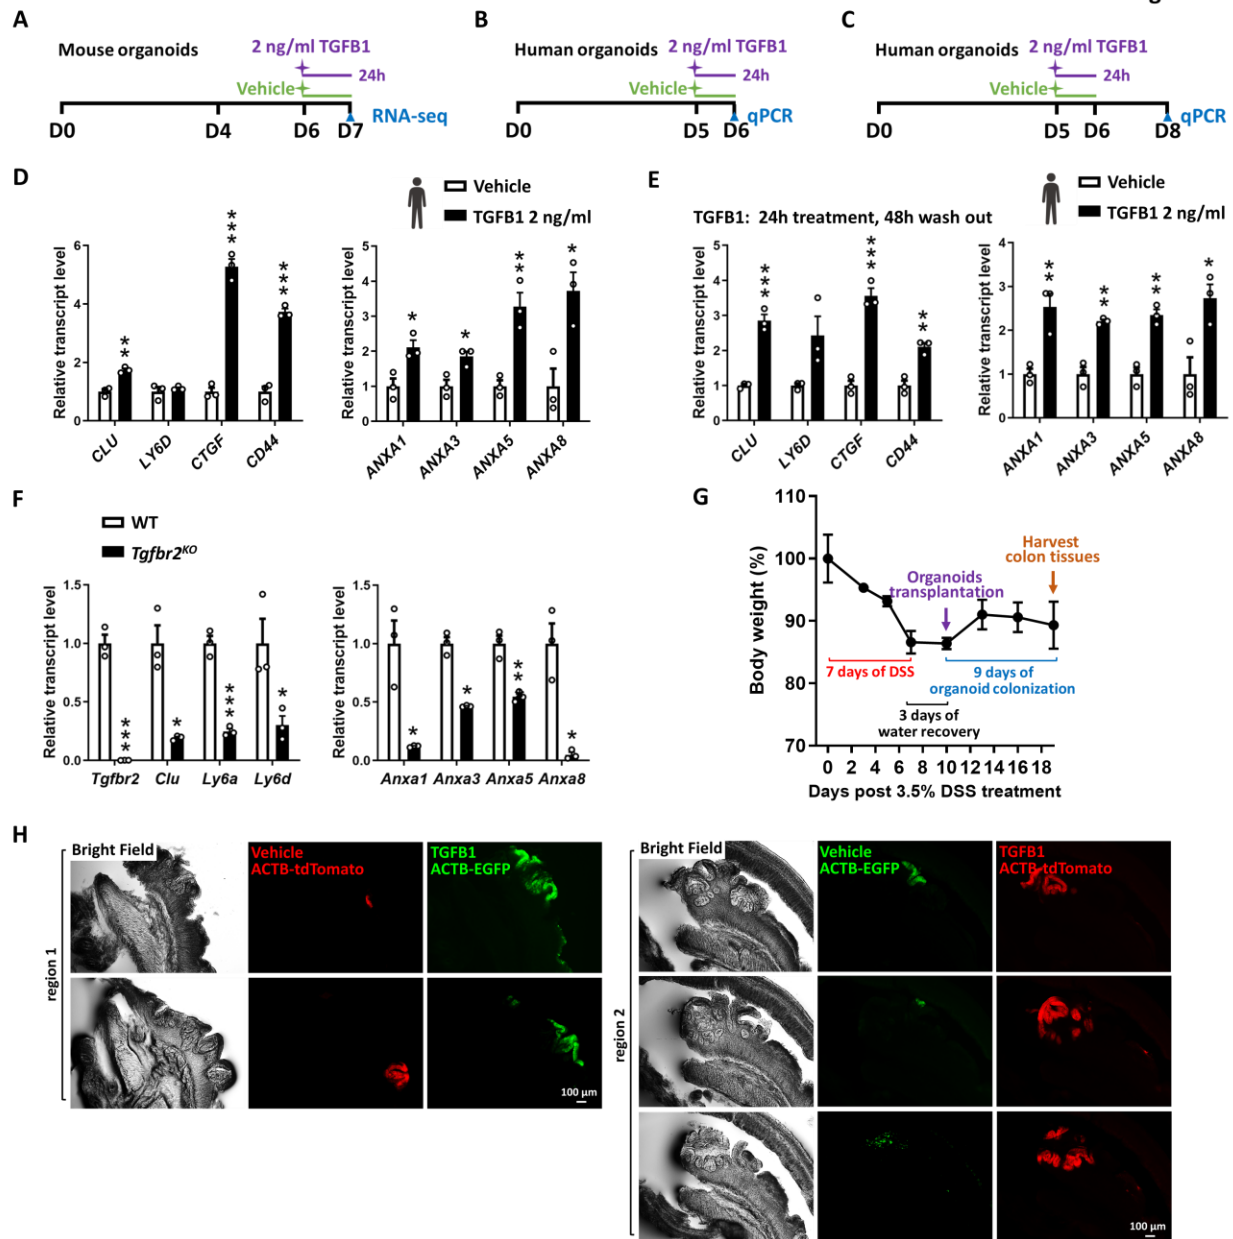

**Figure S7. TGFβ1 pre-treated organoids transplant more efficiently in DSS-damaged colon. (A)**

Schematic for the bulk RNA-seq experimental design of non-IR mouse organoids. **(B-E)** TGFβ1-induced fetal/regenerative gene signatures are conserved in adult human duodenal organoid cultures. qRT-PCR indicates that expression of regeneration marker genes increases and remains elevated for at least 3 days post-TGFβ1-treatment in adult human duodenal organoid cultures. TGFβ1 treatment was performed for a 24-hour window either **(B, D)** 24 hours or **(C, E)** 72 hours before collection of cells. Human organoids were treated with TGFβ1 on Day 5 (n=3 independent organoid cultures, Student's t-test at  $P < 0.001^{***}$ ,  $P < 0.01^{**}$  or  $P < 0.05^*$ ). All the qRT-PCR data are presented as mean  $\pm$  SEM. **(F)** To inactivate *Tgfbr2*, *Tgfbr2*<sup>f/f</sup>; *Villin-Cre*<sup>ERT2</sup> mice were injected with tamoxifen for 4 consecutive days, and harvested 4 days after the first injection for primary organoid culture. Littermate controls were injected with vehicle. WT and *Tgfbr2*<sup>KO</sup> organoids were collected on Day 7. qRT-PCR reveals that



fetal/regenerative genes are suppressed in intestinal organoids upon loss of *Tgfbr2* (n=3 independent organoid cultures, Student's t-test at  $P < 0.001^{***}$ ,  $P < 0.01^{**}$  or  $P < 0.05^*$ ). **(G)** Body weight of mice treated with DSS in organoid transplantation experiment. NOD mice were treated with 3.5% DSS for 7 days. After 3 days of water recovery, organoid transplantation was performed and colon tissues were harvested 9 days after organoid transplant (n=5 biological replicates). **(H)** TGF $\beta$ 1 pre-treatment enhances organoid engraftment in DSS-treated mice. Examples of representative regions. Consecutive cryosections that represent the same colonization event were counted as one region. 21 organoid-colonized regions were found from 5 mice.
